# Supplementary material for: Cerebrospinal fluid neurofilament light chain in multiple sclerosis and its subtypes: a meta-analysis of case–control studies
Source: PubMed Central journal article supplement (PMC6820150; doi:10.1136/jnnp-2018-319190), 2019-05-23

## Maximum number of days between clinical relapse and CSF sampling

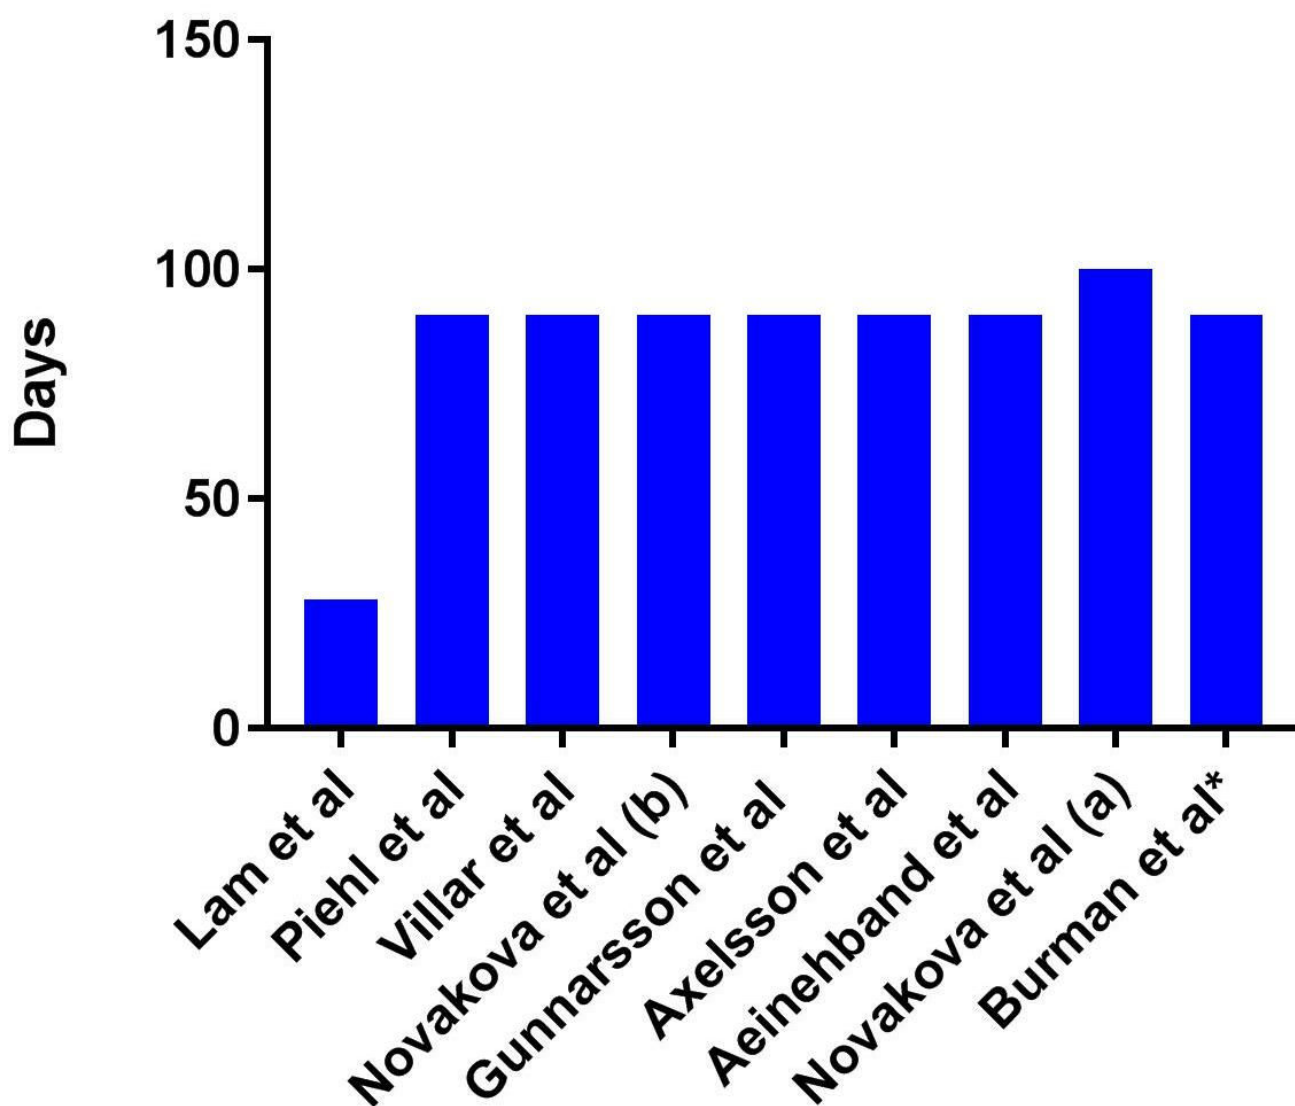

Supplement: jnnp-2018-319190supp003.pdf [file jnnp-2018-319190supp003.pdf]
